# Supplementary material
Source: publisher figshare collection journal article supplement (https://frontiersin.figshare.com/ndownloader/files/35572544)
Supplement: Supplementary file [file 35572544]

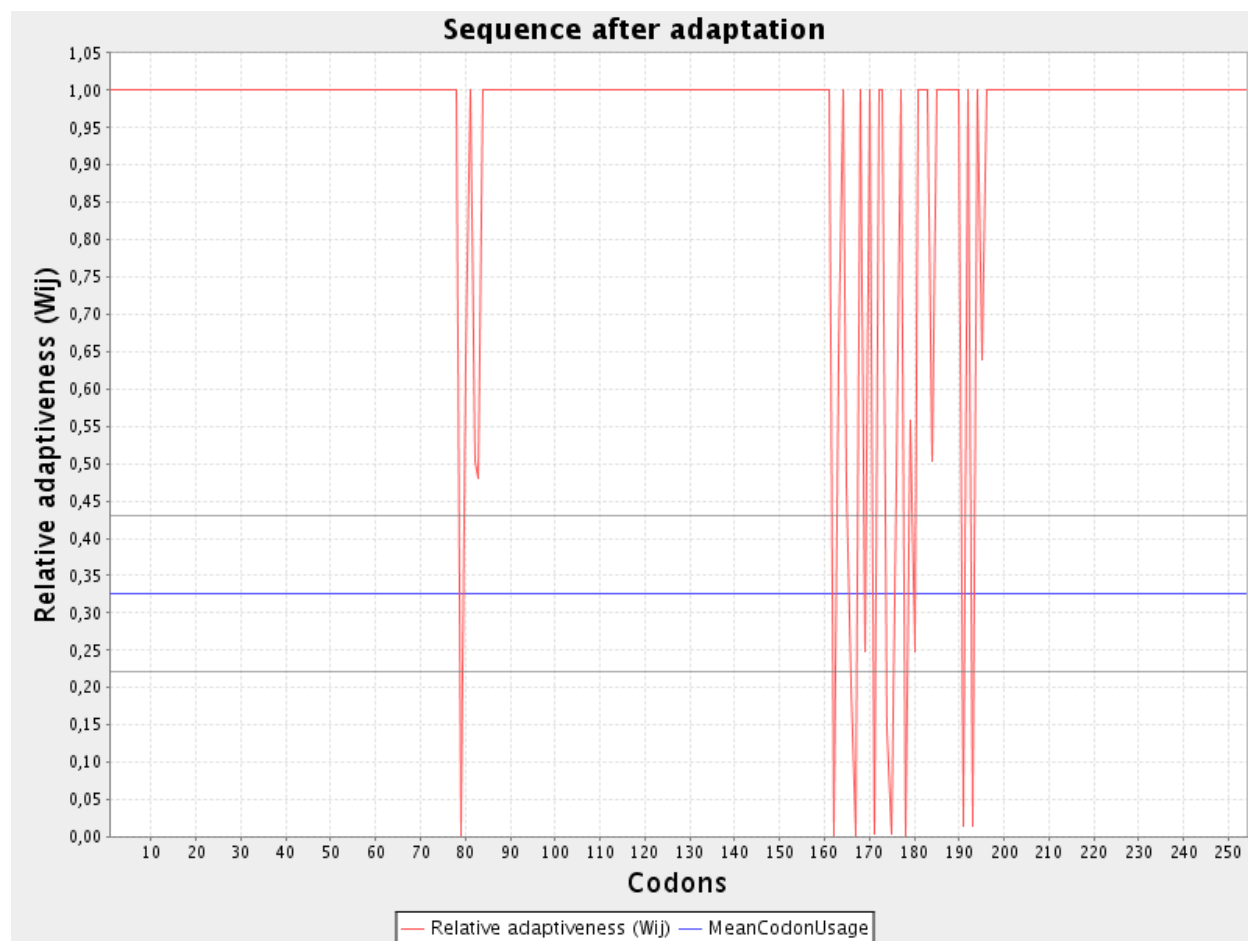

**Figure S5.** Codon adaptation graph of BFV.
